# Supplementary material for: Left Atrium Assessment by Speckle Tracking Echocardiography in Cryptogenic Stroke: Seeking Silent Atrial Fibrillation
Source: MDPI journal article supplement (doi:10.3390/jcm10163501), 2021-08-09
Supplement: s1 [file s1]

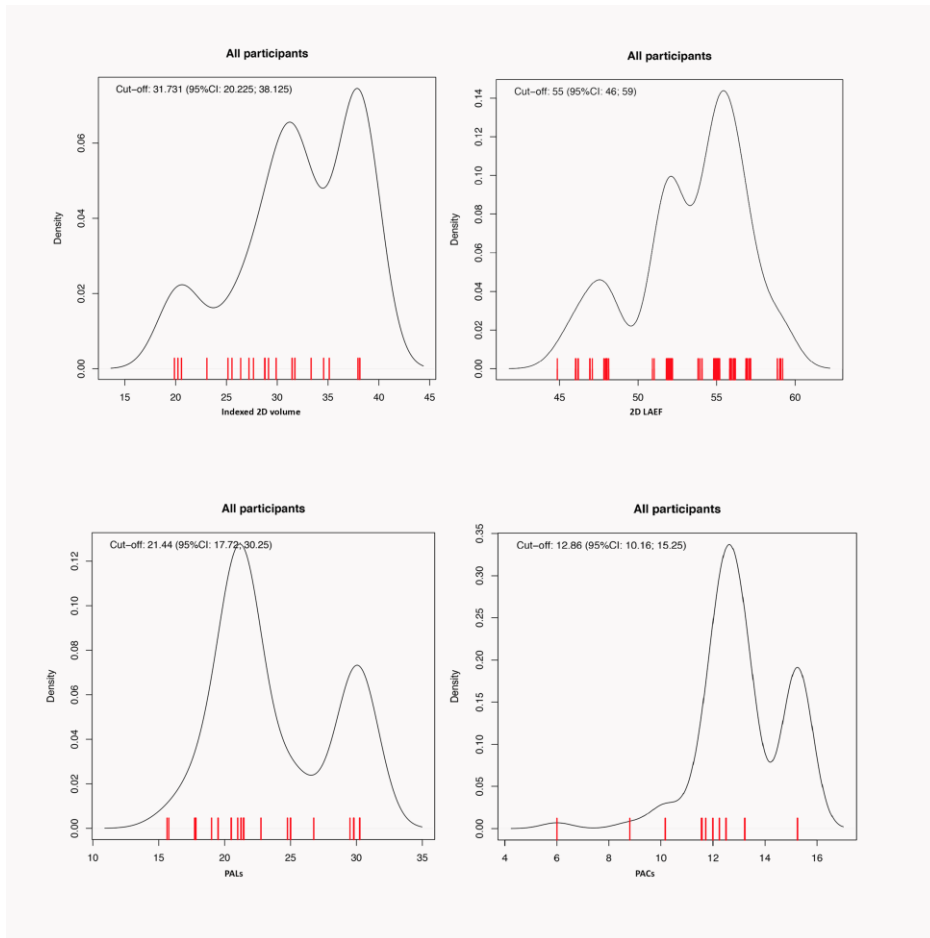

Figure S1: Bootstrapping analysis graphs for the echocardiographic parameters analysed: left atrial ejection fraction (LAEF), peak atrial longitudinal strain (PALs), and peak atrial contraction strain (PACs).
